# Supplementary material
Source: PubMed Central journal article supplement (PMC8562958)
Supplement: djab084_supplementary_data.pdf [file djab084_supplementary_data.pdf]

**Supplementary Table 1. Parameter Estimates from Elastic Net Selection with at least one component of sarcopenia as the outcome**

| <b>Parameter</b>                             | <b>Estimate</b> |
|----------------------------------------------|-----------------|
| Intercept                                    | 0.382489        |
| Mitochondrial Copy Number Standard Deviation | -0.017873       |
| Age at diagnosis group < 14 years            | 0.026156        |
| Female                                       | 0.054348        |
| Abdominal radiation                          | 0.038162        |
| Cranial radiation no anthracycline           | 0.124640        |
| Chest radiation                              | 0.027804        |
| Glucocorticoids                              | -0.032892       |
| Reference Haplogroup                         | 0.002920        |
| European Haplogroup                          | -0.001772       |
| Inactive                                     | 0.075266        |
| rs2943656 A allele                           | 0.035673        |
| rs4842924 T allele                           | -0.013995       |
